# Supplementary material for: Evaluation of phlorotannin bioaccessibility and antioxidant capacity stability of a safe and sustainable brown seaweed extract: role of age-related digestion changes and matrix composition
Source: Research Square preprint supplement (doi:10.21203/rs.3.rs-7427244/v1), 2025-10-03
Supplement: Supplementary file 1 [file 86cb75838cfd8550a5ccaae0.docx]

Supplementary material S2. Composition of simulated fluids based on 500 mL of solution

| **Components** | **Molarity** | **SSF** | | **SGF** | | **SIF** | |
| --- | --- | --- | --- | --- | --- | --- | --- |
| **mL** | **%** | **mL** | **%** | **mL** | **%** |
| KCl | 0.5 | 15.1 | 3.0 | 6.9 | 1.4 | 6.8 | 1.4 |
| KH2PO4 | 0.5 | 3.7 | 0.7 | 0.9 | 0.2 | 0.8 | 0.2 |
| NaHCO3 | 1 | 6.8 | 1.5 | 12.5 | 2.5 | 42.5 | 8.5 |
| NaCl | 2 | 0 | 0 | 11.8 | 2.4 | 9.6 | 1.9 |
| MgCl2(H2O)6 | 0.15 | 0.5 | 0.1 | 0.4 | 0.1 | 1.1 | 0.2 |
| (NH4)2CO3 | 0.5 | 0.1 | 0.01 | 0.5 | 0.1 | 0 | 0 |
| HCl | 6 | 0.1 | 0.02 | 1.3 | 0.3 | 0.7 | 0.1 |
| H2O purified | __ | 473.8 | 94.8 | 465.7 | 93.1 | 438.5 | 87.7 |
| **Total** |  | **500** | **100** | **500** | **100** | **500** | **100** |
